# Supplementary material
Source: PubMed Central journal article supplement (PMC8844595)
Supplement: jiab575_suppl_supplementary_materials.pdf [file jiab575_suppl_supplementary_materials.pdf]

## **Supplemental Table and Figure Index.**

**Supplemental Figure 1: Cumulative COVID-19 Vaccination over Time (at least one dose), By Country**

**Supplemental Figure 2: Cumulative probability of Vaccination over time among REPRIEVE participants, By Age**

**Supplemental Figure 3: Cumulative probability of Vaccination over time among REPRIEVE participants, By BMI**

**Supplemental Figure 4: Cumulative probability of Vaccination over time among REPRIEVE participants, By ASCVD PCE**

**Supplemental Figure 5: Cumulative probability of Vaccination over time among REPRIEVE participants, By Nadir CD4 Cell Count**

**Supplemental Figure 6: Cumulative probability of Vaccination over time among REPRIEVE participants, By Baseline CD4 Cell Count**

**Supplemental Figure 7: Cumulative probability of Vaccination over time among REPRIEVE participants, By Duration of ART**

**Supplemental Figure 8: Cumulative probability of Vaccination over time among REPRIEVE participants, By History of AIDS**

**Supplemental Table 1: Comparison of Country-Specific Data from Our World in Data to Data from the WHO**

**Supplemental Table 2: Global COVID-19 Vaccination Policies**

**Supplemental Table 3: Participant Characteristics by Vaccine Status as of January 1, 2021**

**Supplemental Table 4: List of REPRIEVE Site PIs**

Supplemental Figure 1: Cumulative COVID-19 Vaccination over Time (at least one dose), By Country

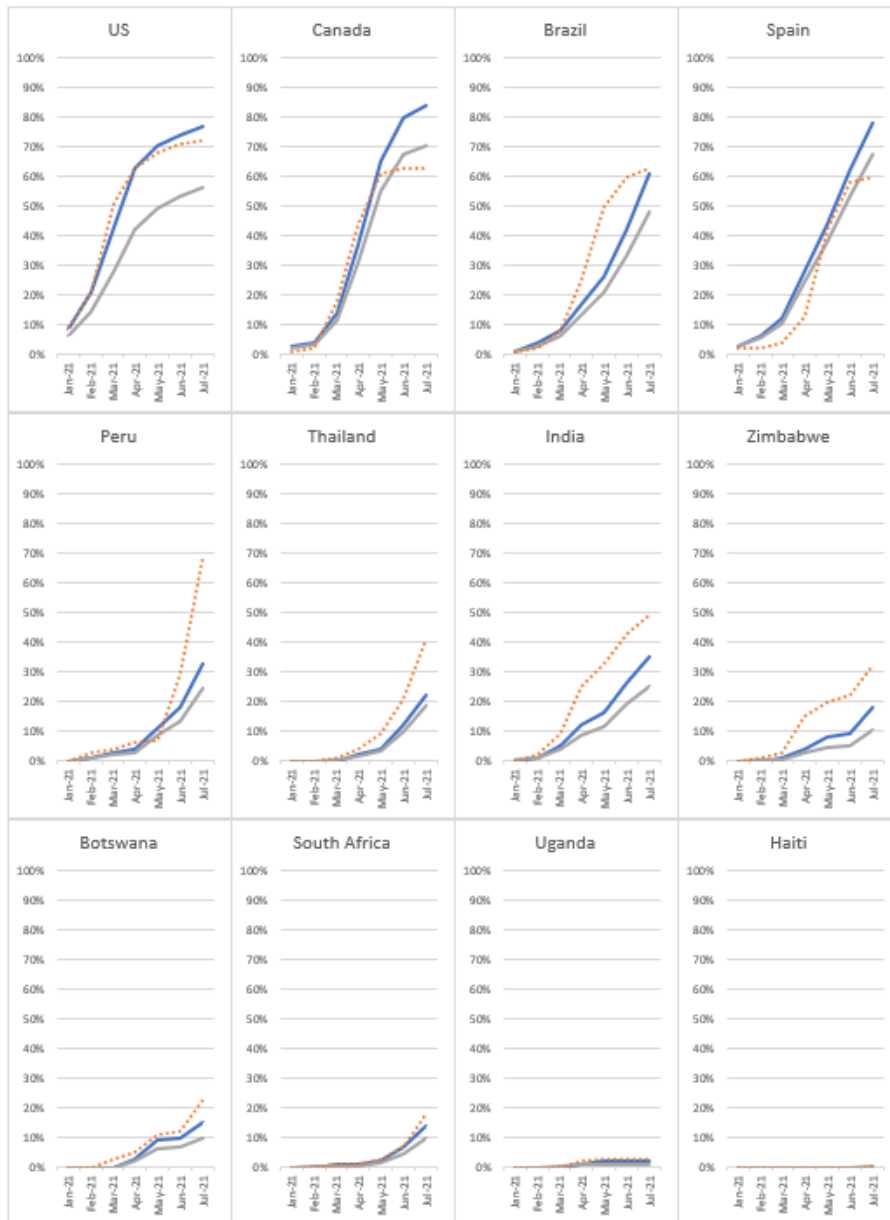

REPRIVE Total Country Population Eligible Country Population

**Supplemental Figure 2: Cumulative probability of Vaccination over time, By Age**

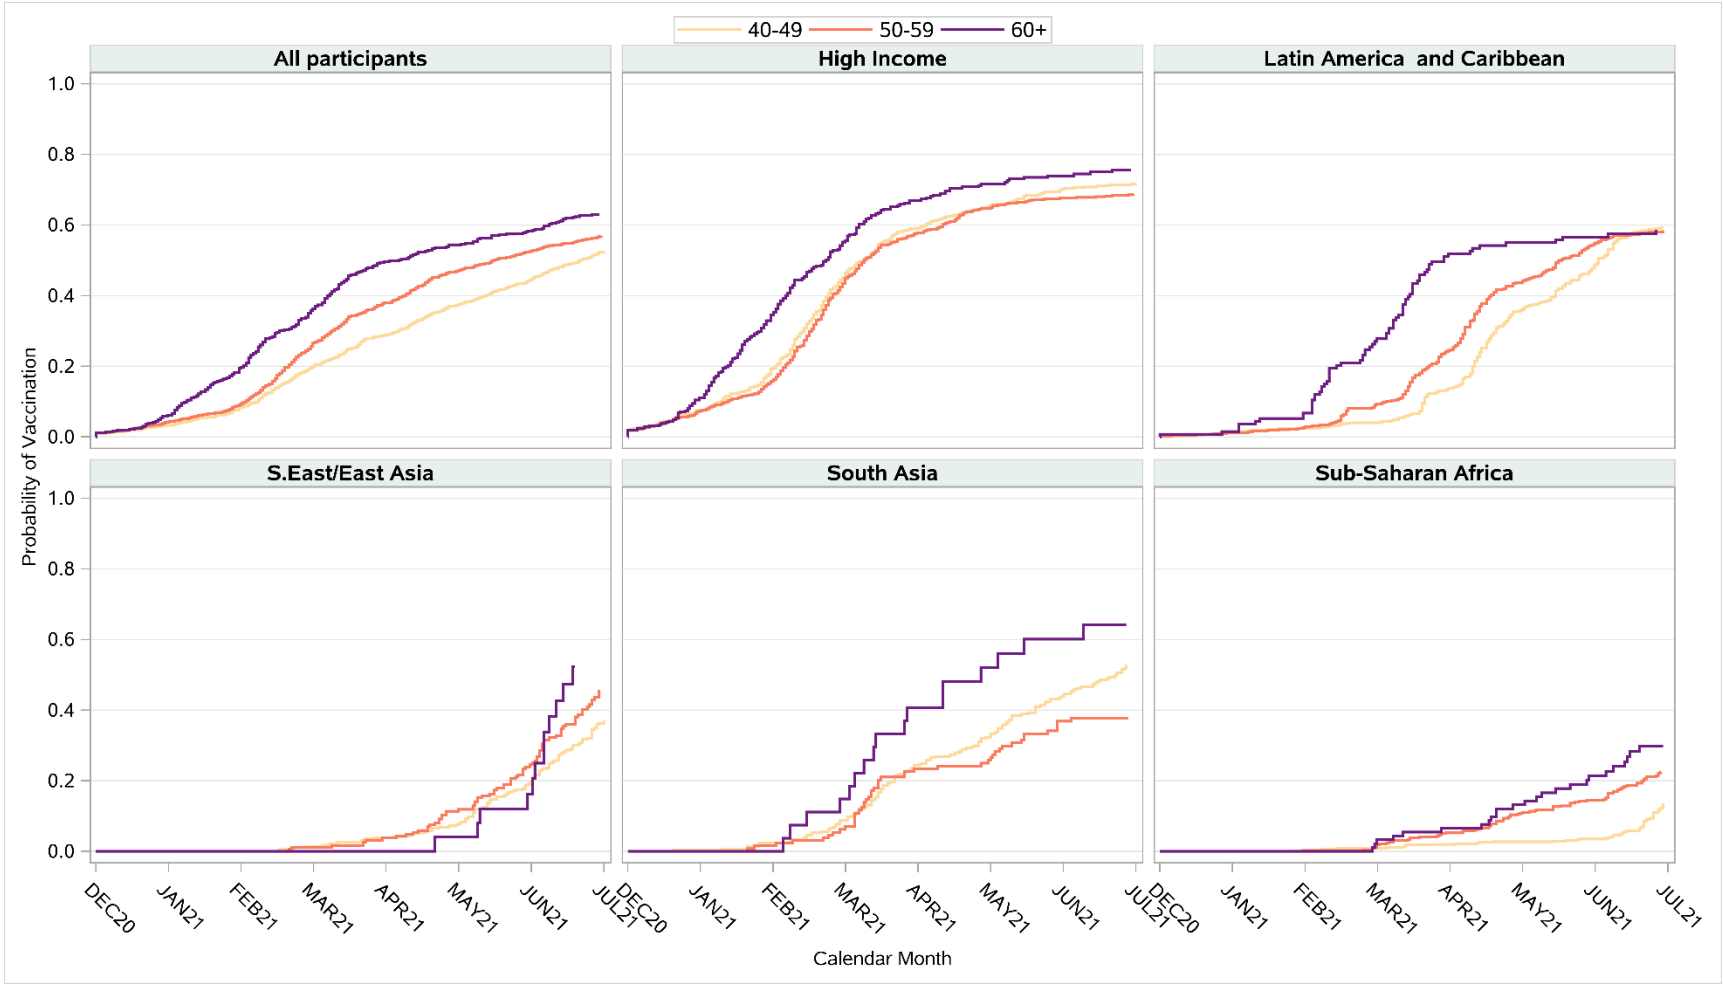

Participants with no follow-up in 2021 are censored at January 1, 2021. X-axis tick marks are given at the end of a given month.

**Supplemental Figure 3: Cumulative probability of Vaccination over time, By BMI**

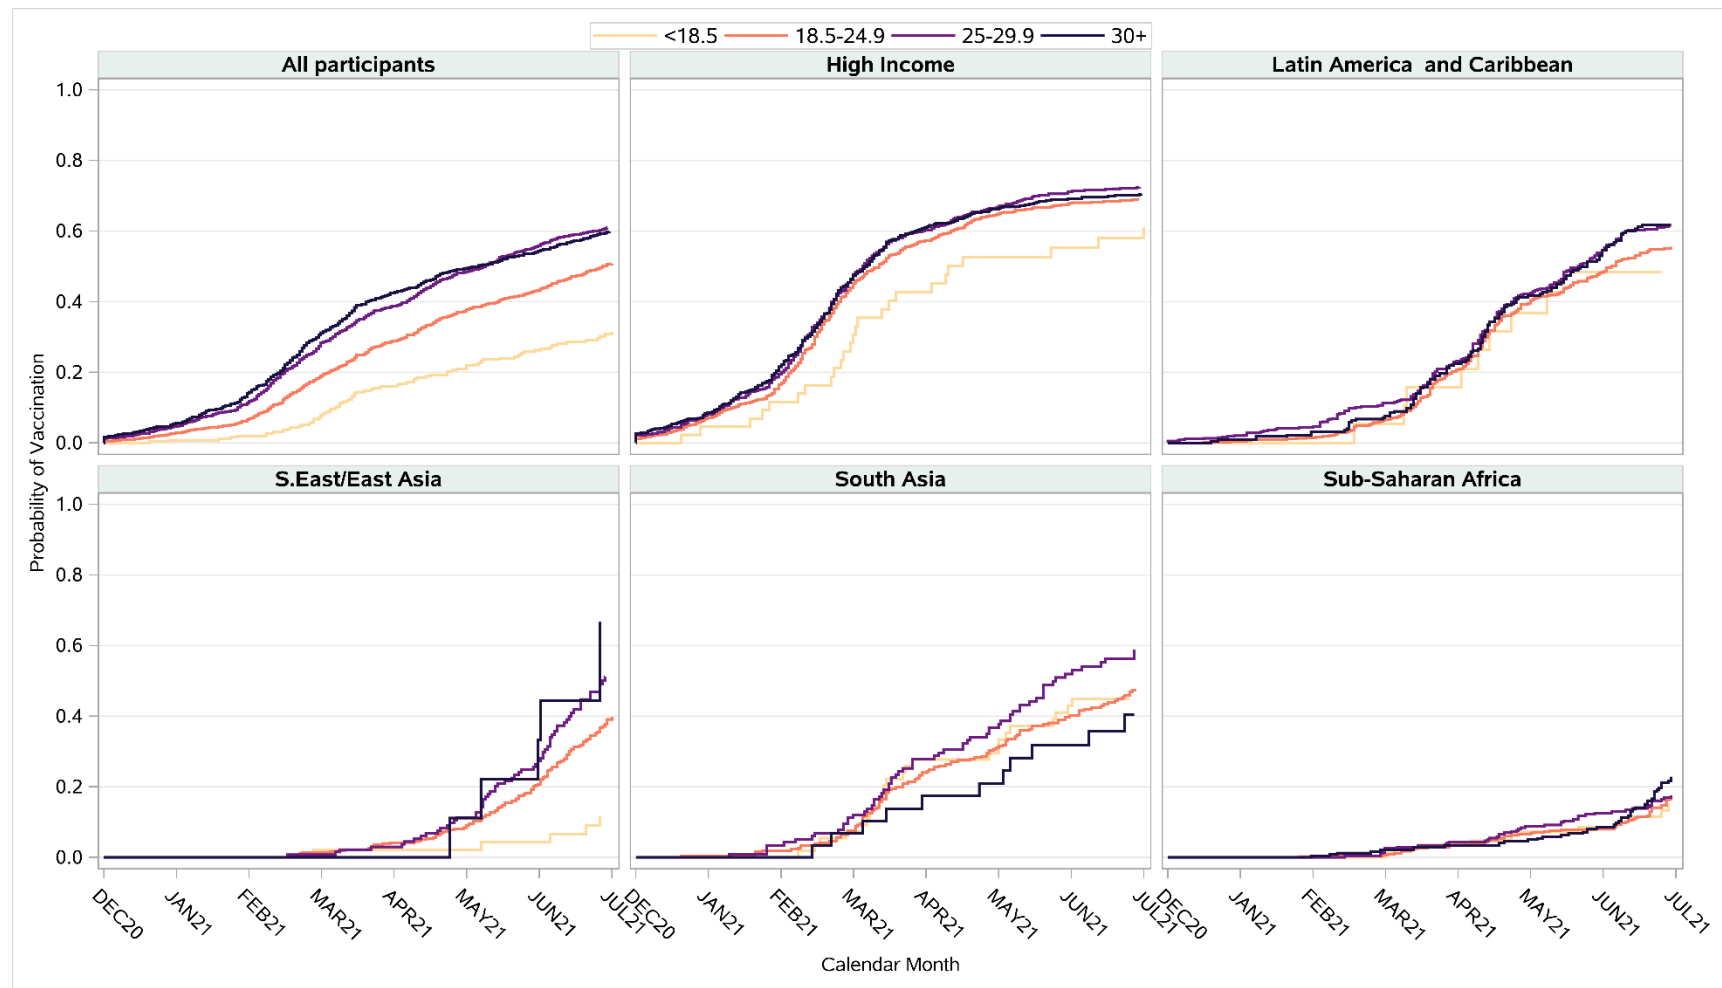

Participants with no follow-up in 2021 are censored at January 1, 2021. X-axis tick marks are given at the end of a given month.

Supplemental Figure 4: Cumulative probability of Vaccination over time, By ASCVD PCE

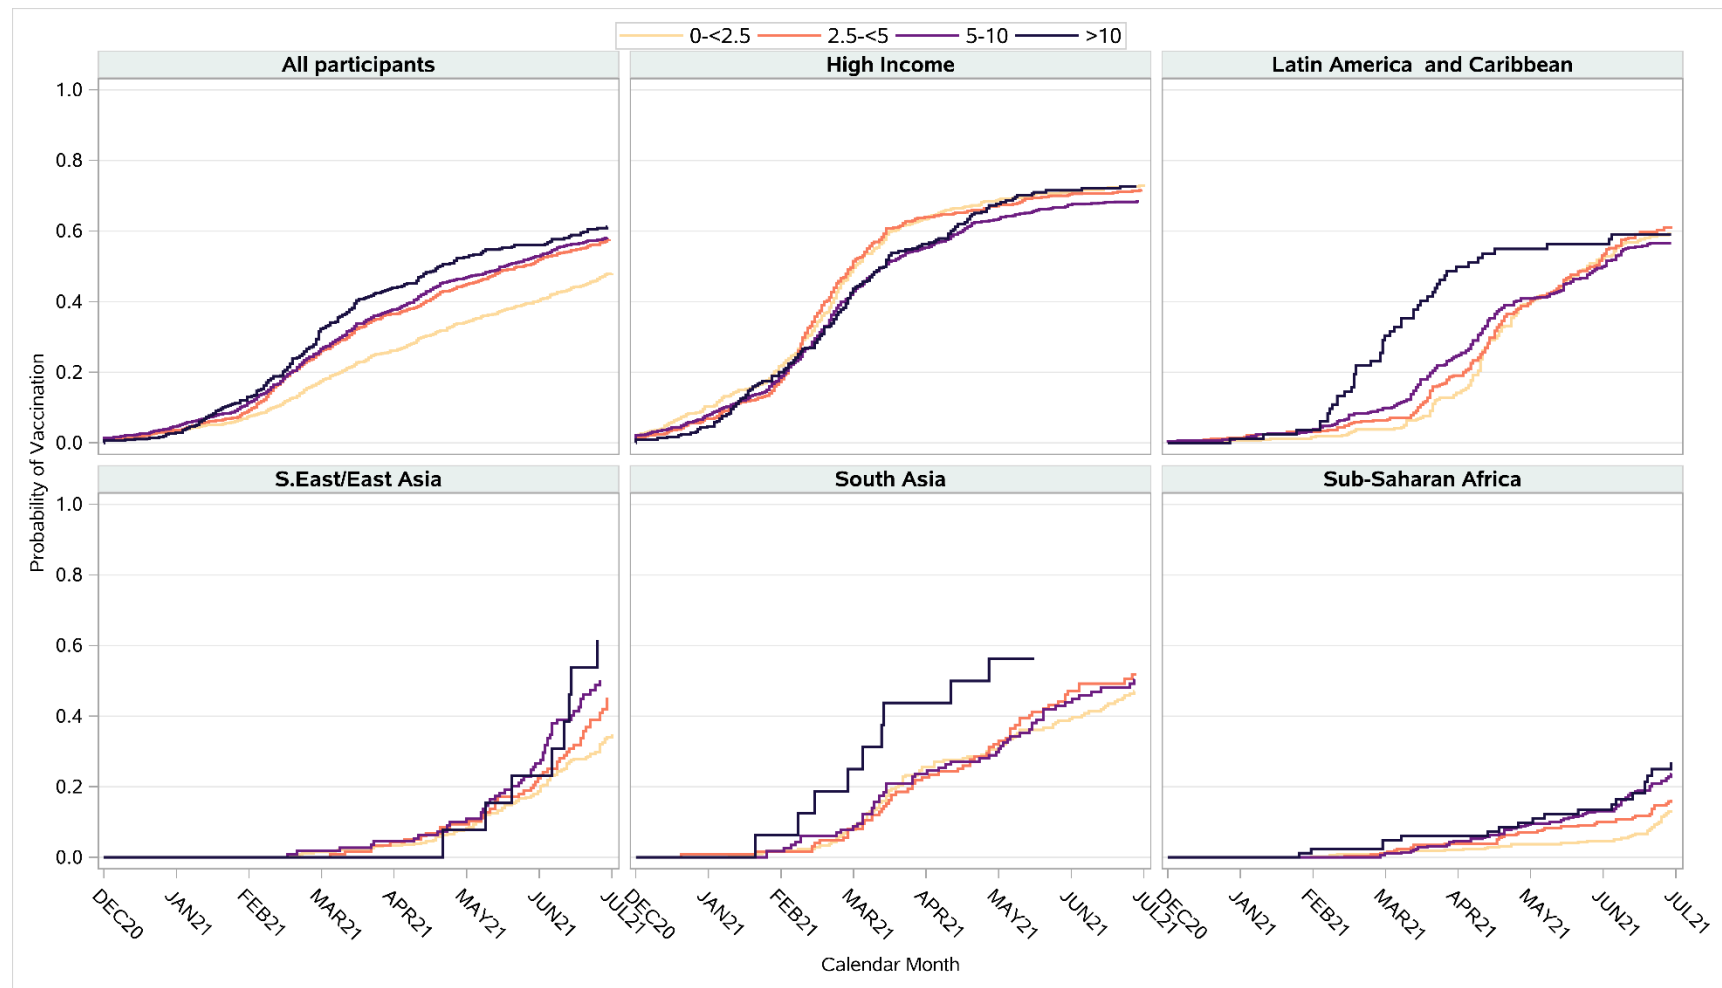

Participants with no follow-up in 2021 are censored at January 1, 2021. X-axis tick marks are given at the end of a given month.

Supplemental Figure 5: Cumulative probability of Vaccination over time, By Nadir CD4 Cell Count

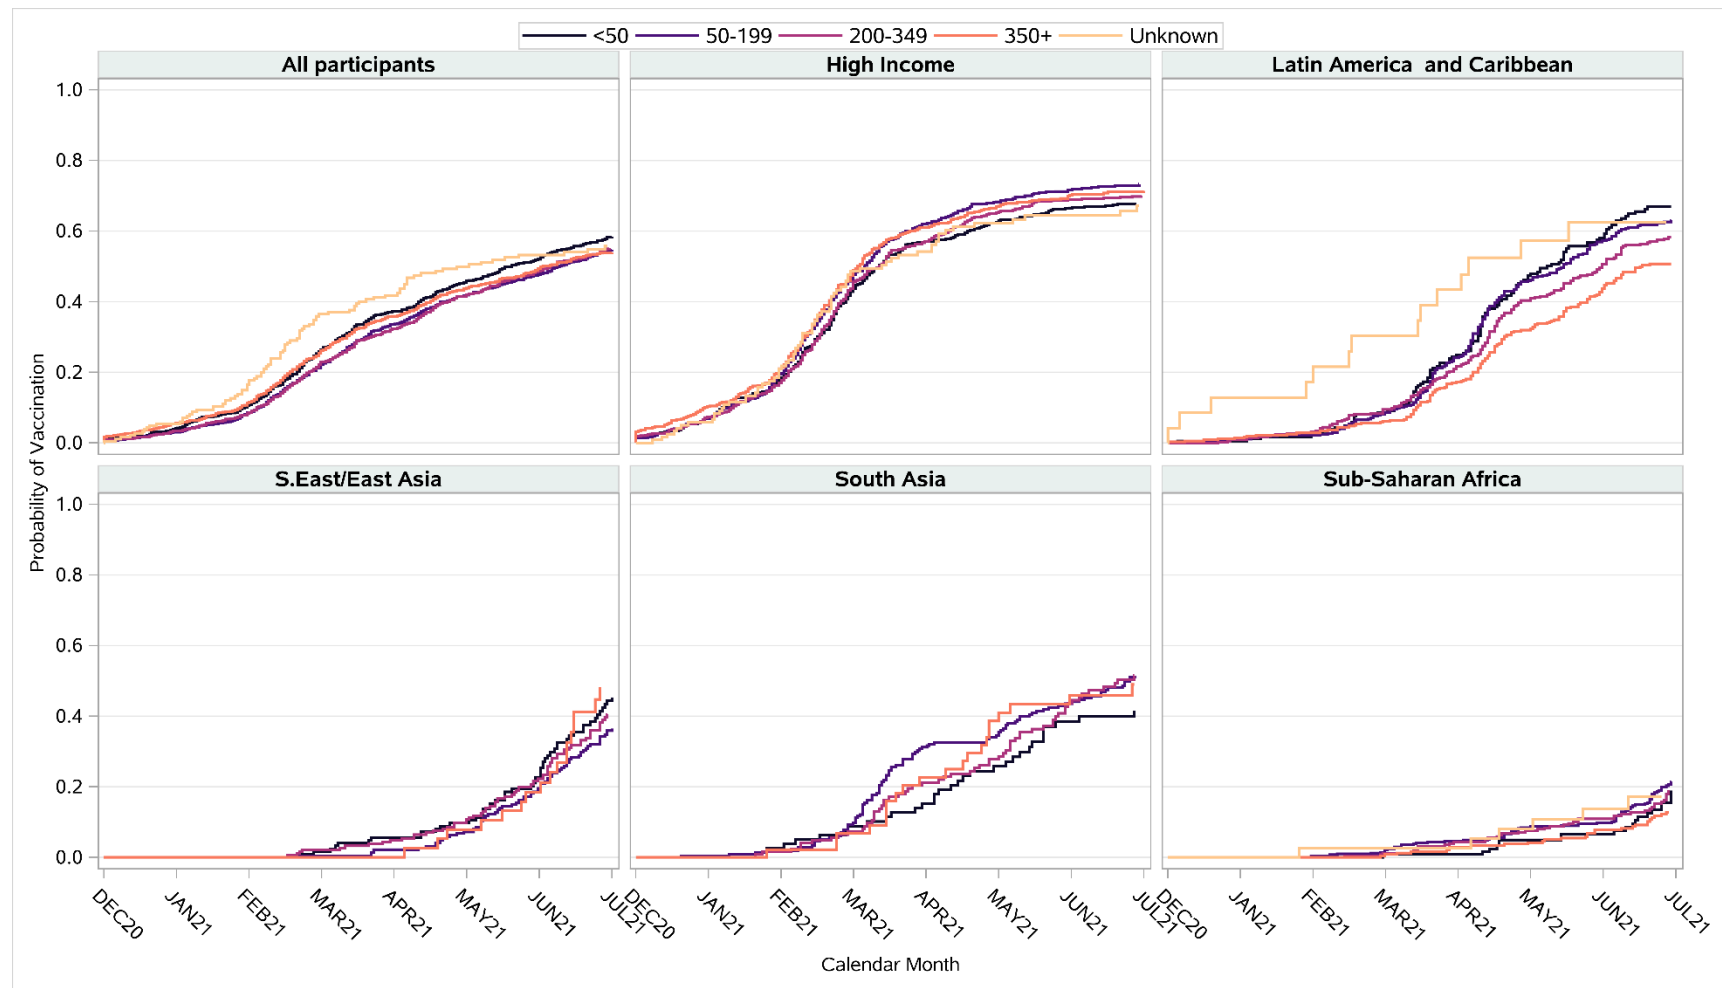

Participants with no follow-up in 2021 are censored at January 1, 2021. X-axis tick marks are given at the end of a given month.

Supplemental Figure 6: Cumulative probability of Vaccination over time, By Baseline CD4 Cell Count

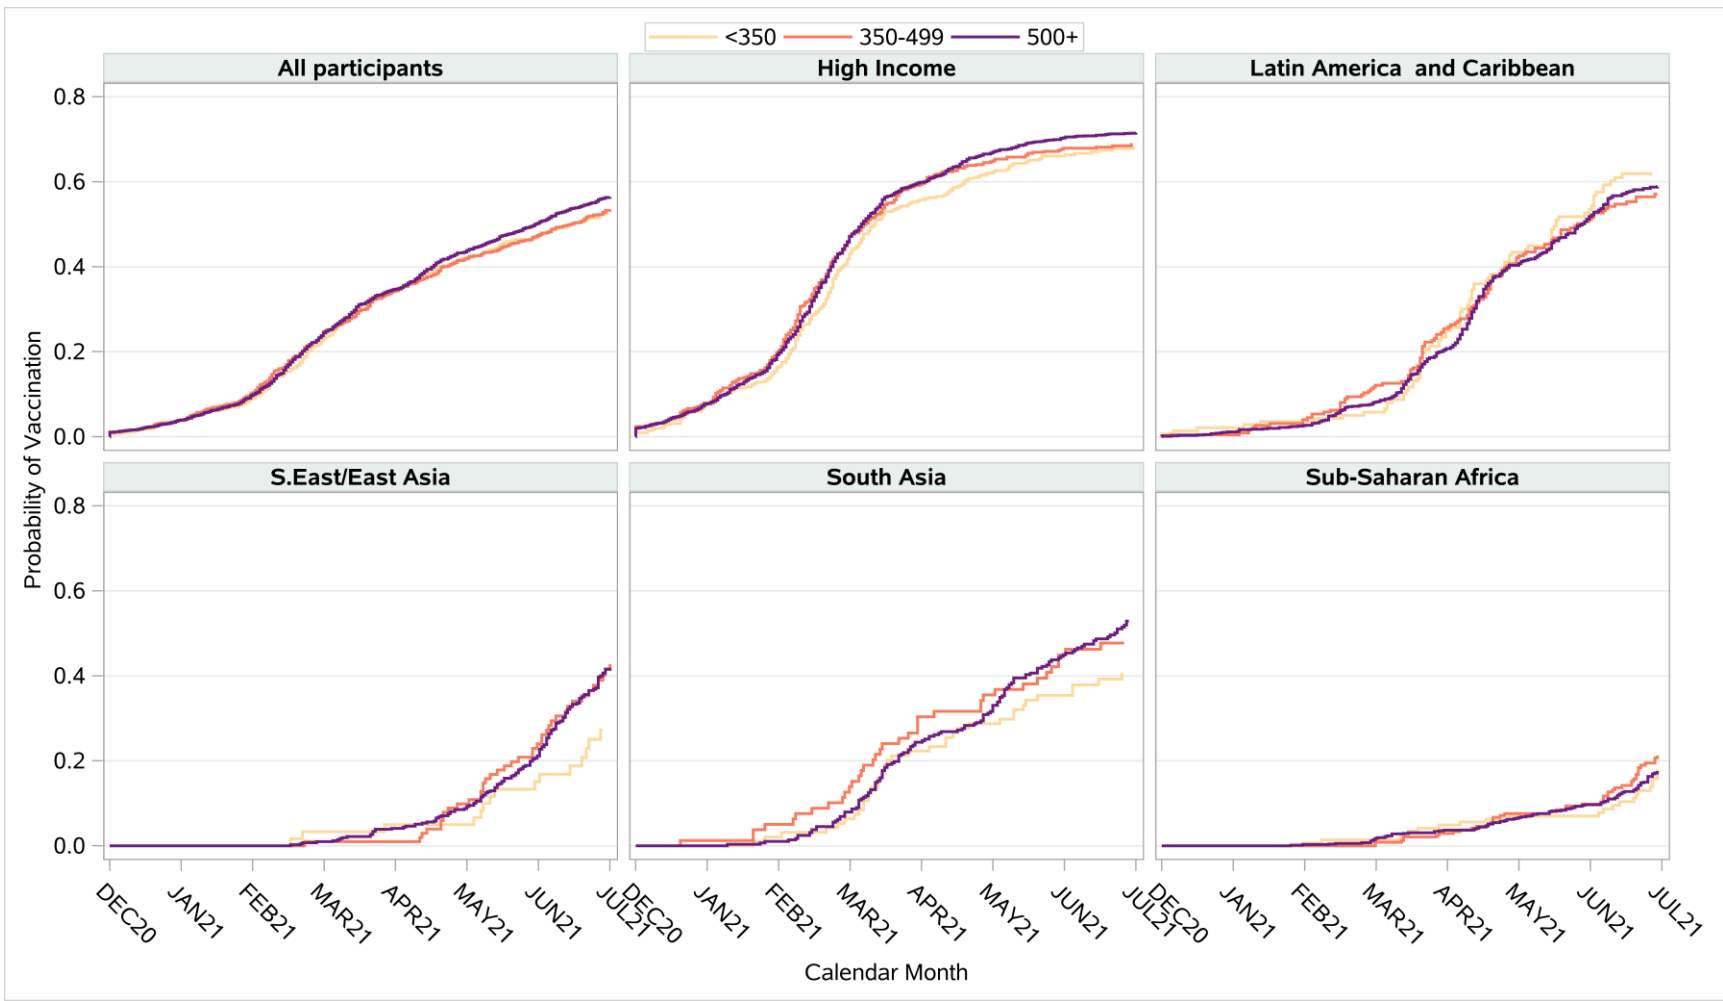

Participants with no follow-up in 2021 are censored at January 1, 2021. X-axis tick marks are given at the end of a given month.

**Supplemental Figure 7: Cumulative probability of Vaccination over time, By Duration of ART**

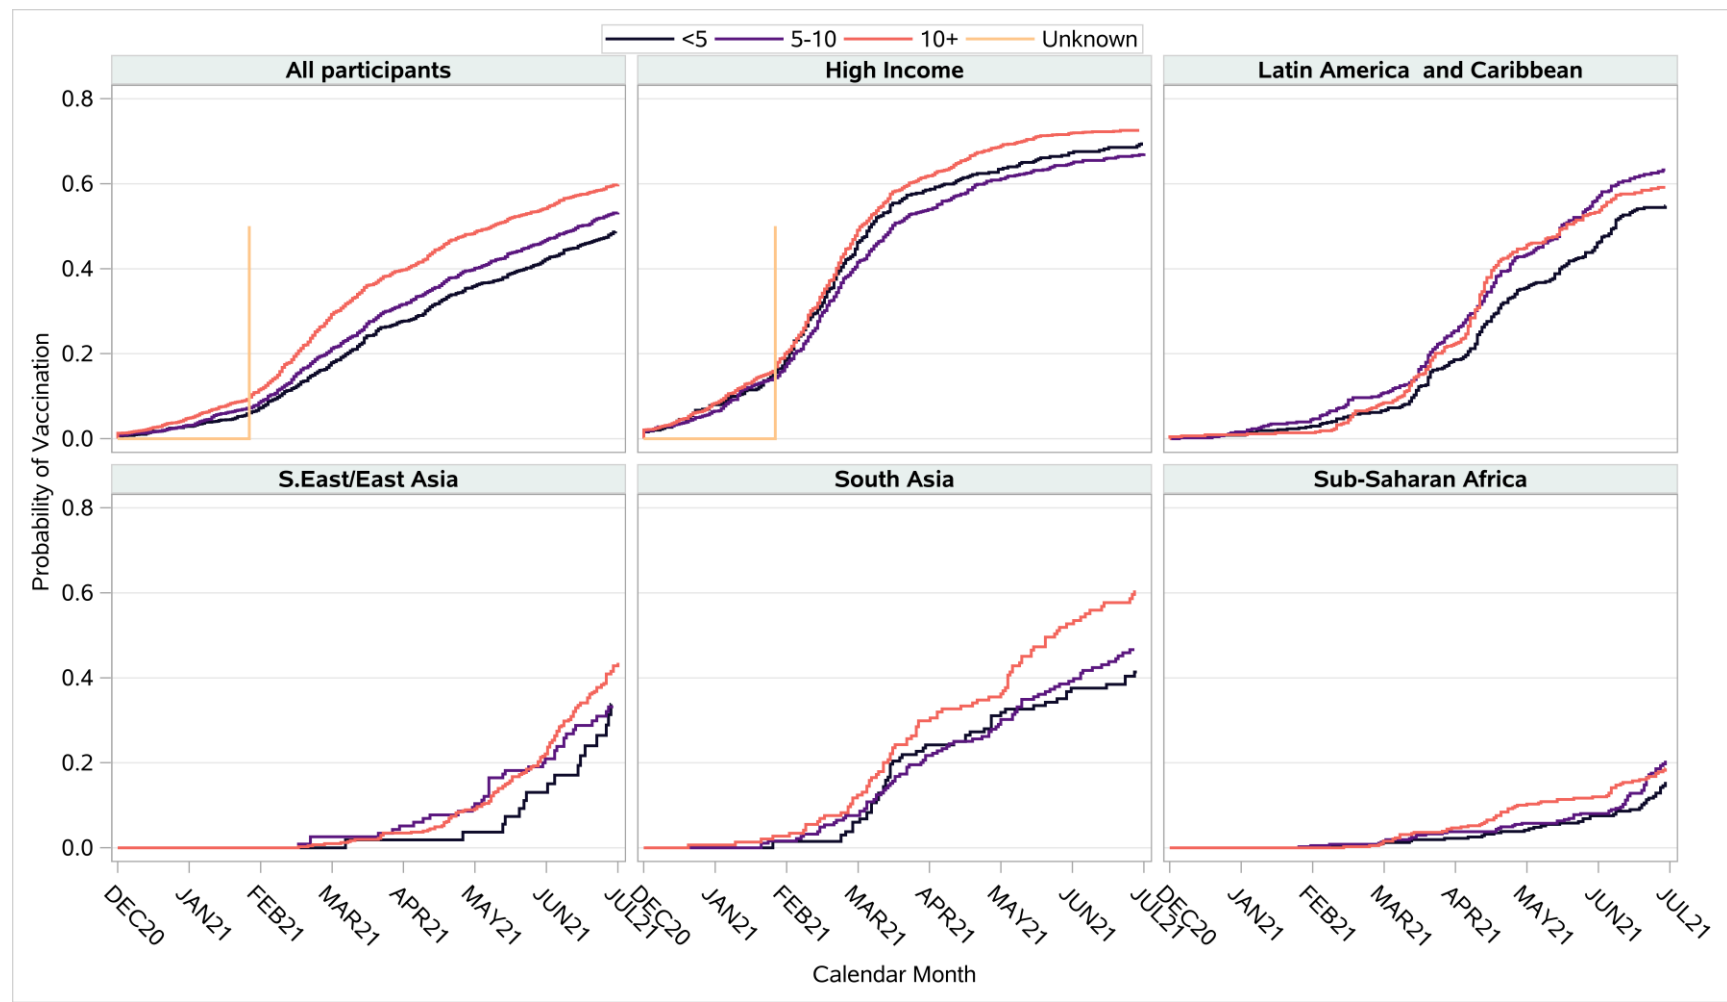

Participants with no follow-up in 2021 are censored at January 1, 2021. X-axis tick marks are given at the end of a given month.



Supplemental Figure 8: Cumulative probability of Vaccination over time, By History of AIDS

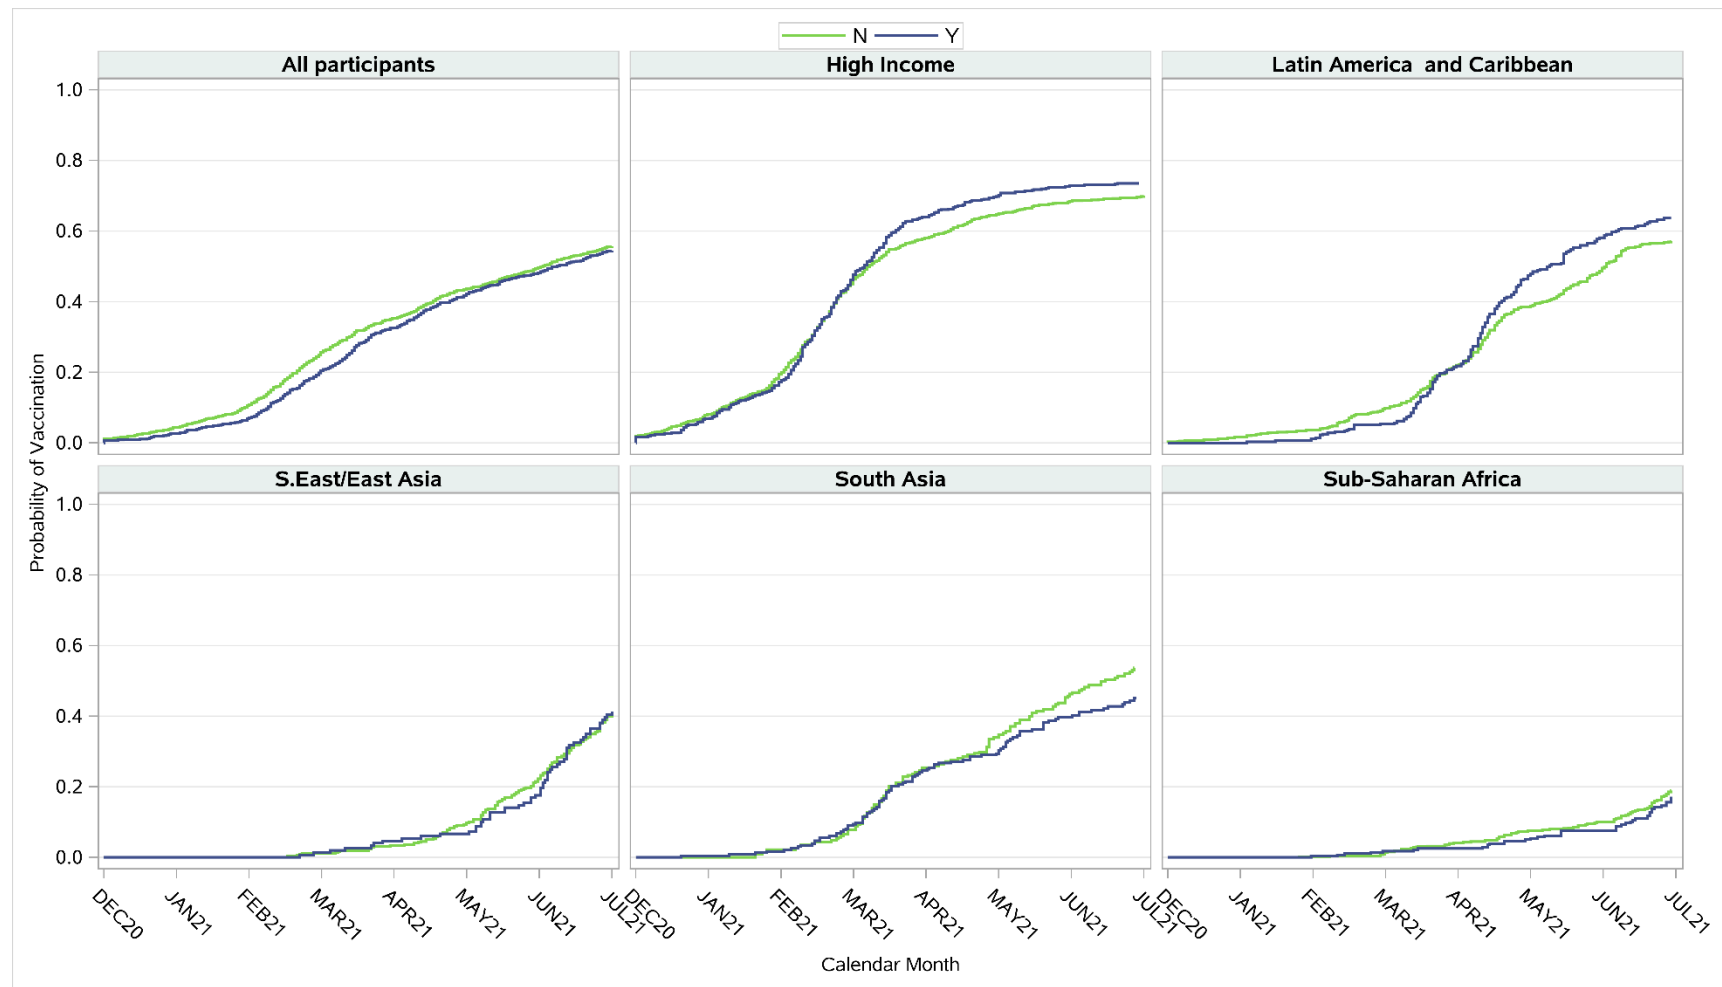

Participants with no follow-up in 2021 are censored at January 1, 2021. X-axis tick marks are given at the end of a given month.

**Supplemental Table 1. Comparison of Country-Specific Data from Our World in Data to Data from the WHO**

|                    | Jan-21 | Feb-21 | Mar-21 | Apr-21 | May-21 | Jun-21 | Jul-21 |
|--------------------|--------|--------|--------|--------|--------|--------|--------|
| Botswana – OWD     | 0%     | 0%     | 0%     | 2%     | 6%     | 7%     | 10%    |
| Botswana – WHO     |        |        |        | 2%     | 2%     | 7%     | 11%    |
| Brazil - OWD       | 1%     | 3%     | 6%     | 13%    | 21%    | 33%    | 48%    |
| Brazil - WHO       |        |        |        |        | 23%    |        |        |
| Canada – OWD       | 2%     | 4%     | 12%    | 31%    | 55%    | 67%    | 71%    |
| Canada – WHO       |        |        | 29%    |        |        | 66%    | 71%    |
| Haiti – OWD        | 0%     | 0%     | 0%     | 0%     | 0%     | 0%     | <0.1%  |
| Haiti – WHO        |        |        |        |        |        |        |        |
| India – OWD        | 0%     | 1%     | 4%     | 9%     | 12%    | 19%    | 25%    |
| India – WHO        |        |        |        | 9%     | 14%    | 19%    | 28%    |
| Peru – OWD         | 0%     | 1%     | 2%     | 3%     | 9%     | 13%    | 24%    |
| Peru – WHO         |        |        |        |        |        |        |        |
| South Africa – OWD | 0%     | 0%     | 0%     | 1%     | 2%     | 5%     | 10%    |
| South Africa – WHO |        |        |        | 0%     | 0%     | 5%     | 8%     |

|                |    |     |     |     |     |     |     |
|----------------|----|-----|-----|-----|-----|-----|-----|
| Spain – OWD    | 3% | 6%  | 11% | 25% | 38% | 54% | 68% |
| Spain – WHO    |    |     | 19% | 30% | 38% | 53% | 65% |
| Thailand – OWD | 0% | 0%  | 0%  | 2%  | 4%  | 10% | 18% |
| Thailand – WHO |    |     |     | 1%  | 4%  | 11% | 20% |
| Uganda – OWD   | 0% | 0%  | 0%  | 1%  | 1%  | 1%  | 1%  |
| Uganda – WHO   |    |     |     | 1%  | 1%  | 2%  | 2%  |
| US - OWD       | 7% | 15% | 28% | 42% | 50% | 53% | 56% |
| US - WHO       |    |     | 29% | 44% | 51% | 55% | 57% |
| Zimbabwe - OWD | 0% | 0%  | 1%  | 3%  | 4%  | 5%  | 11% |
| Zimbabwe - WHO |    |     |     | 3%  | 5%  | 5%  | 11% |

**Supplemental Table 2: Global COVID-19 Vaccination Policies**

|               | January 28, 2021 | February 28, 2021 | March 28, 2021 | April 28, 2021 | May 28, 2021 | June 28, 2021 | July 28, 2021 | Vaccines Distributed in Each Country                                            |
|---------------|------------------|-------------------|----------------|----------------|--------------|---------------|---------------|---------------------------------------------------------------------------------|
| Botswana      | 0                | 0                 | 1              | 1              | 4            | 2             | 2             | Covaxin, Johnson&Johnson, Moderna, Oxford/AstraZeneca, Pfizer/BioNTech, Sinovac |
| Brazil        | 3                | 3                 | 3              | 3              | 4            | 4             | 4             | Johnson&Johnson, Oxford/AstraZeneca, Pfizer/BioNTech, Sinovac                   |
| Canada        | 3                | 3                 | 3              | 3              | 4            | 5             | 5             | Moderna, Oxford/AstraZeneca, Pfizer/BioNTech                                    |
| Haiti         | 0                | 0                 | 0              | 0              | 0            | 0             | 3             | Johnson&Johnson, Moderna                                                        |
| India         | 2                | 2                 | 3              | 4              | 4            | 4             | 4             | Covaxin, Oxford/AstraZeneca, Sputnik V                                          |
| Peru          | 0                | 1                 | 3              | 3              | 3            | 3             | 4             | Oxford/AstraZeneca, Pfizer/BioNTech, Sinopharm/Beijing                          |
| South Africa  | 0                | 1                 | 1              | 2              | 1            | 3             | 3             | Johnson&Johnson, Pfizer/BioNTech                                                |
| Spain         | 2                | 2                 | 2              | 2              | 3            | 3             | 5             | Johnson&Johnson, Moderna, Oxford/AstraZeneca, Pfizer/BioNTech                   |
| Thailand      | 0                | 0                 | 0              | 0              | 2            | 2             | 2             | Oxford/AstraZeneca, Pfizer/BioNTech, Sinopharm/Beijing, Sinovac                 |
| Uganda        | 0                | 1                 | 1              | 1              | 3            | 3             | 3             | Johnson&Johnson, Moderna, Oxford/AstraZeneca, Pfizer/BioNTech, Sinovac          |
| United States | 1                | 2                 | 2              | 4              | 5            | 5             | 5             | Johnson&Johnson, Moderna, Pfizer/BioNTech                                       |
| Zimbabwe      | 0                | 1                 | 3              | 4              | 5            | 5             | 5             | Oxford/AstraZeneca, Sinopharm/Beijing, Sinovac, Sputnik V                       |

0: No vaccine availability

1: Availability for ONE of following: key workers/ clinically vulnerable groups / elderly groups

2: Availability for TWO of following: key workers/ clinically vulnerable groups / elderly groups

3: Availability for ALL of following: key workers/ clinically vulnerable groups / elderly groups

4: Availability for all three plus partial additional availability (select broad groups/ages)

5: Universal availability

## **Vaccine Key**

Two-dose vaccines: Moderna, Pfizer/BioNTech, Covaxin, Sinovac, Sputnik V, Sinopharm/Beijing

One-dose vaccines: Oxford/AstraZeneca, Johnson&Johnson

Data from Our World in Data and the WHO

Ritchie H, Mathieu E, Rodés-Guirao L, et al. Coronavirus Pandemic (COVID-19). Our World in Data. 2020

WHO COVID-19 Vaccination Dashboard

**Supplemental Table 3. Participant Characteristics by Vaccine Status as of January 1, 2021**

| Characteristic         |                             | Total<br>(N=6952) |
|------------------------|-----------------------------|-------------------|
| <b>Demographics</b>    |                             |                   |
| GBD Super Region       | High Income                 | 3,450 (50%)       |
|                        | Latin America and Caribbean | 1,352 (19%)       |
|                        | S.East/East Asia            | 582 (8%)          |
|                        | South Asia                  | 469 (7%)          |
|                        | Sub-Saharan Africa          | 1,098 (16%)       |
| Country of Enrollment  | USA                         | 3,161 (45%)       |
|                        | Brazil                      | 1,042 (15%)       |
|                        | Thailand                    | 582 (8%)          |
|                        | South Africa                | 527 (8%)          |
|                        | India                       | 469 (7%)          |
|                        | Botswana                    | 273 (4%)          |
|                        | Spain                       | 198 (3%)          |
|                        | Uganda                      | 175 (3%)          |
|                        | Peru                        | 142 (2%)          |
|                        | Haiti                       | 136 (2%)          |
|                        | Canada                      | 123 (2%)          |
|                        | Zimbabwe                    | 123 (2%)          |
|                        | Age (years)                 | Median (Q1,Q3)    |
| 10%,90%                |                             | 42,59             |
| 40-49                  |                             | 3,307 (48%)       |
|                        | 50-59                       | 3,029 (44%)       |
|                        | 60+                         | 616 (9%)          |
| Natal sex              | Female                      | 2,212 (32%)       |
| Race <sup>2</sup>      | White                       | 2,336 (34%)       |
|                        | Black or African American   | 3,020 (43%)       |
|                        | Asian                       | 1,087 (16%)       |
|                        | Other                       | 509 (7%)          |
| Ethnicity <sup>3</sup> | Hispanic or Latino          | 1,820 (26%)       |
|                        | Not Hispanic or Latino      | 4,840 (70%)       |
|                        | Unknown                     | 292 (4%)          |

| Characteristic                      |                      | Total<br>(N=6952) |
|-------------------------------------|----------------------|-------------------|
| <b>Cardiovascular and Metabolic</b> |                      |                   |
| Diabetes                            |                      | 60 (1%)           |
| Hypertension                        |                      | 2,494 (36%)       |
| BMI (kg/m <sup>2</sup> )            | <18.5                | 265 (4%)          |
|                                     | 18.5-24.9            | 2,814 (41%)       |
|                                     | 25-29.9              | 2,378 (34%)       |
|                                     | 30+                  | 1,489 (21%)       |
| ASCVD risk score (%)                | 0-<2.5               | 1,922 (28%)       |
|                                     | 2.5-<5               | 1,843 (27%)       |
|                                     | 5-10                 | 2,680 (39%)       |
|                                     | >10                  | 507 (7%)          |
| Smoking status                      | Current              | 1,674 (24%)       |
|                                     | Former               | 1,693 (24%)       |
|                                     | Never                | 3,578 (52%)       |
| <b>Comorbid Conditions</b>          |                      |                   |
| History of cancer                   |                      | 261 (4%)          |
| History of non-AIDS cancer          |                      | 137 (2%)          |
| History of kidney disease           |                      | 26 (<0.5%)        |
| Chronic active HBV                  |                      | 185 (3%)          |
| Chronic active HCV                  |                      | 121 (2%)          |
| <b>HIV-Related Health History</b>   |                      |                   |
| Total ART use duration (years)      | <5                   | 1,539 (22%)       |
|                                     | 5-10                 | 2,059 (30%)       |
|                                     | 10+                  | 3,352 (48%)       |
|                                     | Unknown              | 2 (<0.5%)         |
| Mode of HIV Acquisition             | Heterosexual Contact | 3,638 (52%)       |
|                                     | Homosexual Contact   | 2,415 (35%)       |
|                                     | Injection Drug Use   | 159 (2%)          |
|                                     | Multiple Modes       | 241 (3%)          |
|                                     | Other                | 90 (1%)           |

| Characteristic                           |            | Total<br>(N=6952) |
|------------------------------------------|------------|-------------------|
|                                          | Unknown    | 405 (6%)          |
| History of AIDS-defining event           |            | 1,717 (25%)       |
| Nadir CD4 count (cells/mm <sup>3</sup> ) | <50        | 1,263 (18%)       |
|                                          | 50-199     | 2,181 (31%)       |
|                                          | 200-349    | 1,815 (26%)       |
|                                          | 350+       | 1,486 (21%)       |
|                                          | Unknown    | 207 (3%)          |
| CD4 count (cells/mm <sup>3</sup> )       | <350       | 943 (14%)         |
|                                          | 350-499    | 1,285 (18%)       |
|                                          | 500+       | 4,724 (68%)       |
| HIV-1 RNA                                | <LLQ       | 4,680 (88%)       |
|                                          | LLQ -< 400 | 518 (10%)         |
|                                          | 400+       | 111 (2%)          |

**Abbreviations:** GBD, global burden of disease; BMI, body mass index (calculated as weight in kilograms divided by height in meters squared); ASCVD, atherosclerotic cardiovascular disease; AIDS, acquired immunodeficiency syndrome; HBV, hepatitis B virus; HCV, hepatitis C virus; ART, antiretroviral therapy; HIV, human immunodeficiency virus; RNA, ribonucleic acid



**Supplemental Table 4: REPRIEVE Site PIs**

| <b>Clinical Research Site</b>                                                         | <b>Clinical Research Site Leader</b> |
|---------------------------------------------------------------------------------------|--------------------------------------|
| Abbott Northwestern Hospital<br>CRS                                                   | Rhame, Frank                         |
| AHF-The Kinder Medical Group<br>CRS                                                   | Kinder, Clifford                     |
| AIDS Research and Treatment<br>Center of the Treasure Coast<br>CRS                    | Pierone Jr., Gerald                  |
| Alabama CRS                                                                           | Heath, Sonya                         |
| Augusta University Research<br>Institute, Inc. CRS                                    | MacArthur, Rodger                    |
| Barranco CRS                                                                          | Lama, Javier                         |
| Baystate Infectious Diseases<br>Clinical Research CRS                                 | Skiest, Daniel                       |
| Bluegrass Care Clinic/University<br>of Kentucky Research<br>Foundation CRS            | Thornton, Alice                      |
| Brigham and Women's Hospital<br>Therapeutics Clinical Research<br>Site (BWH TCRS) CRS | Sax, Paul                            |

|                                                               |                          |
|---------------------------------------------------------------|--------------------------|
| Byramjee Jeejeebhoy Medical College (BJMC) CRS                | Mave, Vidya              |
| CAPRISA eThekweni CRS                                         | Padayatchi, Nesri        |
| Case Clinical Research Site                                   | Jacobson, Jeffrey        |
| Centre for the AIDS Programme of Research in South Africa CRS | Naidoo, Kogieleum        |
| Centre hospitalier de l'Université Laval CRS                  | Trottier, Sylvie         |
| Centro de Pesquisas Clínicas IC-HCFMUSP CRS                   | Kallas, Esper            |
| Centro de Referencia e Treinamento DST/AIDS CRS               | Madruga, José Valdez     |
| Chapel Hill CRS                                               | Wohl, David              |
| Chiang Mai University HIV Treatment (CMU HIV Treatment) CRS   | Supparatpinyo, Khuanchai |
| Chronic Viral Illness Service CRS                             | Falutz, Julian           |
| Cincinnati Clinical Research Site                             | Fichtenbaum, Carl        |
| Columbia P&S CRS                                              | Sobieszczyk, Magdalena   |
| Community AIDS Network/Comprehensive Care Clinic CRS          | Schreibman, Tanya        |

|                                                                                             |                       |
|---------------------------------------------------------------------------------------------|-----------------------|
| Cooper Univ. Hosp. CRS                                                                      | Baxter, John          |
| Dallas VA Medical Center CRS                                                                | Bedimo, Roger         |
| Denver Public Health CRS                                                                    | Gardner, Edward       |
| Department of Internal Medicine,<br>University of Iowa Hospitals &<br>Clinics CRS           | Stapleton, Jack       |
| Division of Infectious Diseases<br>Clinical Research Center- Drexel<br>University CRS       | Szep, Zsofia          |
| Duke University Medical Center<br>CRS                                                       | Okeke, Nwora          |
| Durban International Clinical<br>Research Site CRS                                          | Laloo, Umesh          |
| Eisenhower Health Center at<br>Rimrock CRS                                                  | Lichtenstein, Kenneth |
| FAMCRU CRS                                                                                  | Cotton, Mark          |
| Florida Department of Health –<br>Hillsborough County                                       | Somboonwit, Charurut  |
| Gaborone CRS                                                                                | Omoz-Oarhe, Ayotunde  |
| Georgetown University CRS (GU<br>CRS)                                                       | Kumar, Princy         |
| GHESKIO Institute of Infectious<br>Diseases and Reproductive<br>Health (GHESKIO - IMIS) CRS | Severe, Patrice       |

|                                                                                |                          |
|--------------------------------------------------------------------------------|--------------------------|
| Greensboro CRS                                                                 | Van Dam, Cornelius       |
| Hamilton Health Sciences –<br>Special Immunology Services<br>Clinic CRS        | Smieja, Marek            |
| Harbor-UCLA CRS                                                                | Daar, Eric               |
| Henry Ford Hosp. CRS                                                           | Markowitz, Norman        |
| HGNI HIV Family Care Clinic -<br>HHFCC CRS                                     | da Silva Pilotto, Jose   |
| Hospital Federal dos Servidores<br>do Estado CRS                               | Joao Filho, Esau         |
| Hospital Nossa Senhora da<br>Conceicao CRS                                     | Santos, Breno            |
| Houston AIDS Research Team<br>CRS                                              | Arduino, Roberto         |
| Indiana University Infectious<br>Diseases Research CRS                         | Gupta, Samir             |
| Infectious Disease Clinical and<br>Translational Research Center<br>(CTRC) CRS | Aberg, Judith            |
| Inova Heart and Vascular<br>Institute CRS                                      | deFilippi, Christopher   |
| Instituto de Infectologia Emilio<br>Ribas CRS                                  | Pereira Jr., Luiz Carlos |
| Instituto de Pesquisa Clinica<br>Evandro Chagas (IPEC) CRS                     | Grinsztejn, Beatriz      |

|                                                                           |                           |
|---------------------------------------------------------------------------|---------------------------|
| James J Peters VA Medical Center CRS                                      | Brown, Sheldon            |
| Johns Hopkins University CRS                                              | Dooley, Kelly             |
| Joint Clinical Research Centre (JCRC)/Kampala Clinical Research Site      | Mutuluuza, Cissy Kityo    |
| Les Centres GHESKIO Clinical Research Site (GHESKIO-INLR) CRS             | Rouzier, Vanessa          |
| Los Angeles LGBT Center CRS                                               | Bolan, Robert             |
| Malcom Randall VA Medical Center CRS                                      | Wang, Gary                |
| Maple Leaf Research CRS                                                   | Smith, Graham             |
| Massachusetts General Hospital CRS (MGH CRS)                              | Gandhi, Rajesh            |
| Medical College of Wisconsin, Inc. CRS                                    | Frank, Michael            |
| Medical University of South Carolina: Division of Infectious Diseases CRS | Eckard, Allison           |
| Michael E. DeBakey VAMC REPRIEVE CRS                                      | Rodriguez-Barradas, Maria |
| Milton Park CRS                                                           | Borok, Margaret           |
| Mount Sinai Beth Israel CRS                                               | Aberg, Judith             |

|                                                             |                          |
|-------------------------------------------------------------|--------------------------|
| Mount Sinai Downtown CRS                                    | Cespedes, Michelle       |
| Mount Sinai St. Luke's<br>Morningside CRS                   | Abrams-Downey, Alexandra |
| Mount Sinai West Samuels CRS                                | Kojic, Erna (Milu)       |
| New Jersey Medical School<br>Clinical Research Center CRS   | Swaminathan, Shobha      |
| Northwestern University CRS                                 | Taiwo, Babafemi          |
| Ohio State University CRS                                   | Koletar, Susan           |
| Oklahoma State University<br>Center for Health Sciences CRS | Baker, Damon             |
| Orlando Immunology Center<br>CRS                            | DeJesus, Edwin           |
| Penn Therapeutics, CRS                                      | Tebas, Pablo             |
| Positive Health Clinic CRS                                  | Hsiao, Chiu-Bin          |
| Projeto Praça Onze Pesquisa em<br>Saúde CRS                 | Schechter, Mauro         |
| Puerto Rico AIDS Clinical Trials<br>Unit CRS                | Santana-Bagur, Jorge     |
| Rush University CRS                                         | Sha, Beverly             |
| Rustenburg CRS                                              | Brumskine, William       |

|                                                                          |                                  |
|--------------------------------------------------------------------------|----------------------------------|
| San Miguel CRS                                                           | Gonzales Saenz, Pedro<br>Augusto |
| School of Medicine, Federal<br>University of Minas Gerais CRS            | Pinto, Jorge                     |
| Soweto ACTG CRS                                                          | Mohapi, Lerato                   |
| Specialty Care Center CRS                                                | Bares, Sara                      |
| Stanford AIDS Clinical Trials Unit<br>CRS                                | Grant, Philip                    |
| Thai Red Cross AIDS Research<br>Centre (TRC-ARC) CRS                     | Avihingsanon, Anchalee           |
| The Miriam Hospital Clinical<br>Research Site (TMH CRS) CRS              | Tashima, Karen                   |
| The Ponce de Leon Center CRS                                             | Del Rio, Carlos                  |
| Toronto General Hospital CRS                                             | Walmsley, Sharon Lynn            |
| Trinity Health and Wellness<br>Center CRS                                | Bedimo, Roger                    |
| Tropical Medicine Foundation Dr.<br>Heitor Vieira Dourado CRS            | Guimaraes de Lacerda,<br>Marcus  |
| Tufts Medical Center CRS                                                 | Wurcel, Alysse                   |
| Tulane - Louisiana Community<br>AIDS Research Program (T-<br>LaCARP) CRS | Mushatt, David                   |
| UCLA CARE Center CRS                                                     | Landovitz, Raphael               |

|                                                                                             |                    |
|---------------------------------------------------------------------------------------------|--------------------|
| UCSD Antiviral Research Center<br>CRS                                                       | Little, Susan      |
| UCSF HIV/AIDS CRS                                                                           | Havlir, Diane      |
| UIC Project WISH CRS                                                                        | Novak, Richard     |
| University of Arizona CRS                                                                   | Connick, Elizabeth |
| University of Cape Town Lung<br>Institute (UCTLI) CRS                                       | Dawson, Rodney     |
| University of Colorado Hospital<br>CRS                                                      | Campbell, Thomas   |
| University of Miami Infectious<br>Disease Research Unit at<br>Jackson Memorial Hospital CRS | Castro, Jose       |
| University of Mississippi Medical<br>Center CRS                                             | Brock, James       |
| University of Pittsburgh CRS                                                                | Riddler, Sharon    |
| University of Rochester Adult HIV<br>Therapeutic Strategies Network<br>CRS                  | Keefer, Michael    |
| University of Southern California<br>CRS                                                    | Dube, Michael      |
| University of Toledo Medical<br>Center CRS                                                  | Duggan, Joan       |



|                                                    |                       |
|----------------------------------------------------|-----------------------|
| University of Washington AIDS<br>CRS               | Collier, Ann          |
| UT Southwestern HIV/ID Clinical<br>Trials Unit CRS | Jain, Mamta           |
| VA West Los Angeles Medical<br>Center CRS          | Goetz, Matthew        |
| Vancouver ID Research & Care<br>Centre Society CRS | Conway, Brian         |
| Vanderbilt Therapeutics (VT)<br>CRS                | Haas, David           |
| Virginia Commonwealth<br>University CRS            | Nixon, Daniel         |
| Wake Forest Baptist Medical<br>Center CRS          | Wilkin, Aimee         |
| Washington University<br>Therapeutics (WT) CRS     | Presti, Rachel        |
| Weill Cornell Chelsea CRS                          | Marks, Kristen        |
| Weill Cornell Uptown CRS                           | Glesby, Marshall      |
| Whitman-Walker Health CRS                          | Henn, Sarah           |
| Wits Helen Joseph Hospital CRS<br>(Wits HJH CRS)   | Badal-Faesen, Sharlaa |
| Yale University CRS                                | Seval, Nikhil         |
